# Supplementary material
Source: PubMed Central journal article supplement (PMC3926167)
Supplement: Supp_Table1.pdf [file Supp_Table1.pdf]

## Supplementary Data

SUPPLEMENTARY TABLE S1. SUMMARY OF MEAN A/C RATIOS AND STATISTICAL ANALYSIS FOR ALL AGE GROUPS

|                                  | <i>Thrb</i> <sup>+/+</sup> | <i>Thrb</i> <sup>PV/+</sup> | <i>Thrb</i> <sup>PV/PV</sup> |
|----------------------------------|----------------------------|-----------------------------|------------------------------|
| <b>1-4.9 months</b>              |                            |                             |                              |
| Mean <i>a/c</i> ratio            | 1.8767                     | 2.0383                      | 2.0327                       |
| SD                               | 0.9599                     | 1.0580                      | 3.1050                       |
| vs. <i>Thrb</i> <sup>PV/+</sup>  | <i>p</i> = 7.1255E-05      |                             |                              |
| vs. <i>Thrb</i> <sup>PV/PV</sup> | <i>p</i> = 0.0449          | <i>p</i> = 0.9585           |                              |
| <b>5-12+ Months</b>              |                            |                             |                              |
| Mean <i>a/c</i> ratio            | 2.0459                     | 1.4699                      | 1.7674                       |
| SD                               | 2.0631                     | 0.3901                      | 0.9862                       |
| vs. <i>Thrb</i> <sup>PV/+</sup>  | <i>p</i> = 4.4477E-18      |                             |                              |
| vs. <i>Thrb</i> <sup>PV/PV</sup> | <i>p</i> = 7.3189E-05      | <i>p</i> = 1.6785E-18       |                              |
